# Supplementary figures and images for: Preferred reporting items for systematic reviews and meta-analyses: the PRISMA Statement
Source: PubMed Central journal article supplement — Open Med. 2009 Jul 21;3(3):e123–30. (PMC3090117), 2009-07-21

Figure S1: Flow of information through the different phases of a systematic review

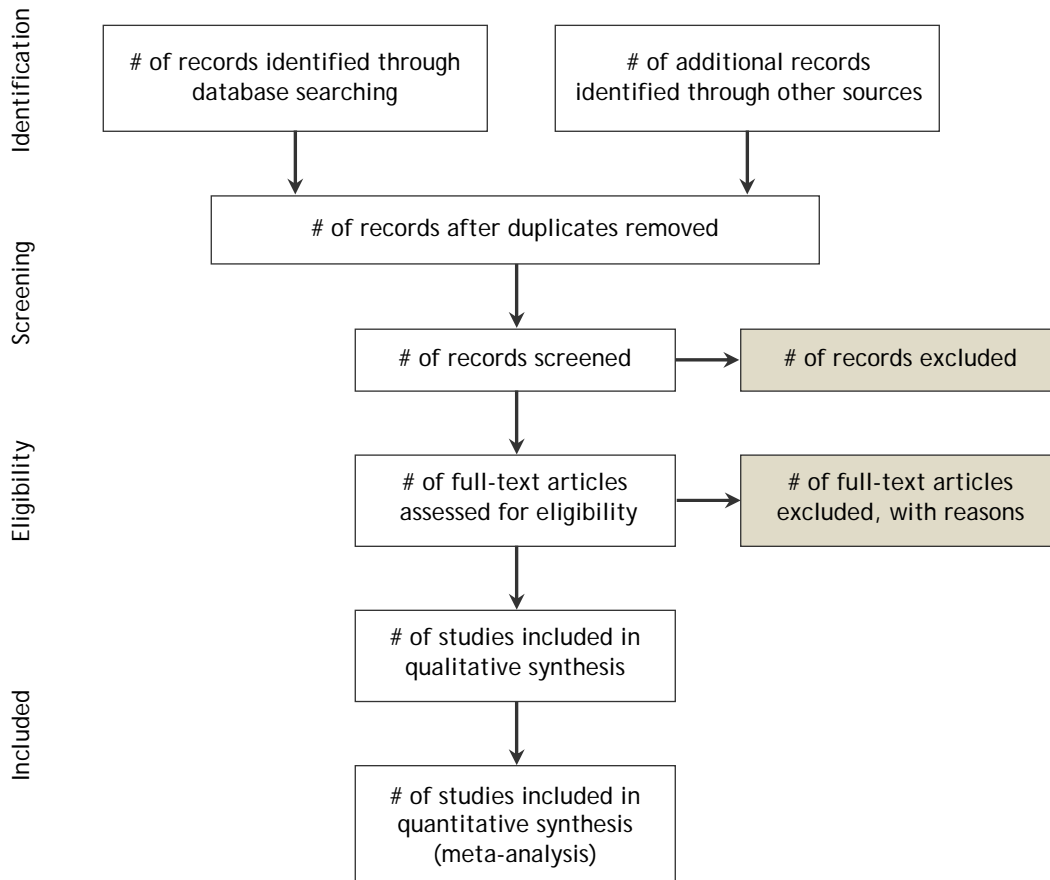

Supplement: OpenMed-03-e123-s001.pdf [file OpenMed-03-e123-s001.pdf]
